# Supplementary material for: Early-Life Cadmium Exposure and Child Development in 5-Year-Old Girls and Boys: A Cohort Study in Rural Bangladesh
Source: PubMed Central journal article supplement (PMC3491924; doi:10.1289/ehp.1104431), 2012-07-03
Supplement: ehp.1104431.s001.pdf [file ehp.1104431.s001.pdf]

## Supplemental Material

### **Early-Life Cadmium Exposure and Child Development in 5-Year-Old Girls and Boys: a Cohort Study in Rural Bangladesh**

Maria Kippler<sup>1#</sup>, Fahmida Tofail<sup>1,2#</sup>, Jena D Hamadani<sup>2</sup>, Renee M Gardner<sup>1</sup>, Sally M Grantham-McGregor<sup>3</sup>, Matteo Bottai<sup>1</sup>, Marie Vahter<sup>1\*</sup>

<sup>1</sup>Institute of Environmental Medicine, Karolinska Institutet, Stockholm, Sweden; <sup>2</sup>International Centre for Diarrhoeal Disease Research, Bangladesh (ICDDR,B), Dhaka, Bangladesh; <sup>3</sup>Centre for International Health and Development, Institute of Child Health, University College London, London, UK

# Authors contributed equally to the manuscript.

\*Marie Vahter, Institute of Environmental Medicine, Division of Metals and Health, Karolinska Institutet, Box 210, SE-171 77, Stockholm, Sweden. Telephone: +46 8 524 875 40. Telefax: +46 8 33 69 81. Email: marie.vahter@ki.se

◆ 25<sup>th</sup> percentile    ■ 50<sup>th</sup> percentile    ▲ 75<sup>th</sup> percentile

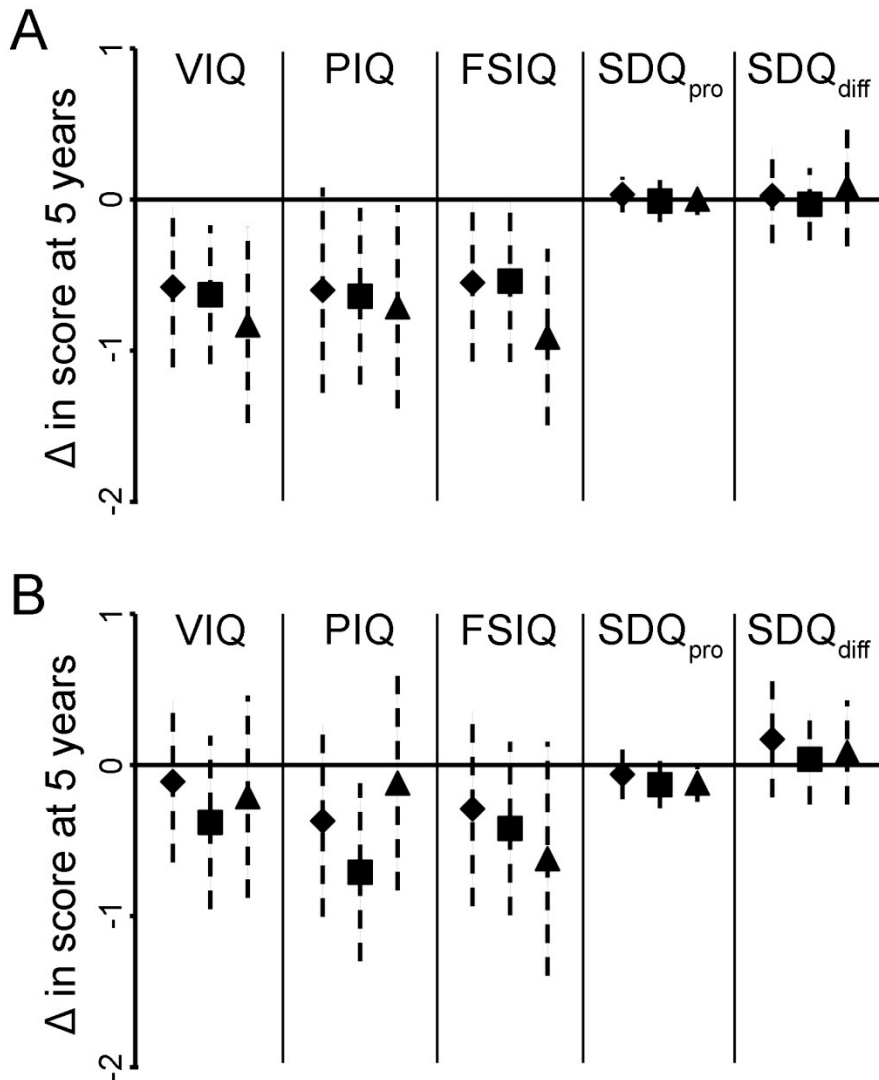

**Supplemental Material, Figure S1** Multivariable-adjusted quantile regression analysis of associations between **A**) maternal urinary cadmium (U-Cd; early pregnancy; log<sub>2</sub>-transformed) and **B**) concurrent childhood U-Cd (log<sub>2</sub>-transformed) with children's developmental measures (25<sup>th</sup> percentile: diamonds, 50<sup>th</sup> percentile: squares, and 75<sup>th</sup> percentile: triangles) at 5 years of age. Estimates with 95% CI represent the change in the values of the 25<sup>th</sup>, 50<sup>th</sup> and 75<sup>th</sup> percentiles of the outcome scores with a doubling of U-Cd exposure adjusted for age at testing, tester, sex, birth order, birth weight, HAZ (5 years), HOME, maternal BMI (early pregnancy), maternal IQ, SES, and maternal or concurrent urinary arsenic (log<sub>2</sub>-transformed).

**Supplemental Material, Table S1** Multivariable-adjusted linear regression analyses of cadmium exposure (maternal or concurrent urinary cadmium; log<sub>2</sub>-transformed) and developmental outcomes at 5 years of age after additionally adjusting for arsenic or/and lead exposure (maternal or concurrent urine concentrations; log<sub>2</sub>-transformed).

|                            | <b>VIQ</b>                  | <b>PIQ</b>                 | <b>FSIQ</b>                   | <b>SDQ<sub>pro</sub></b>      | <b>SDQ<sub>diff</sub></b>  |
|----------------------------|-----------------------------|----------------------------|-------------------------------|-------------------------------|----------------------------|
| Predictors                 | β (95% CI; <i>p</i> )       | β (95% CI; <i>p</i> )      | β (95% CI; <i>p</i> )         | β (95% CI; <i>p</i> )         | β (95% CI; <i>p</i> )      |
| <b>Model A<sup>a</sup></b> |                             |                            |                               |                               |                            |
| Maternal Cd                | -0.78 (-1.2, -0.34; 0.001)  | -0.65 (-1.1, -0.18; 0.006) | -0.77 (-1.2, -0.35; <0.001)   | 0.00016 (-0.098, 0.098; 0.99) | -0.015 (-0.22, 0.19; 0.88) |
| Maternal As                | -0.47 (-0.76, -0.18; 0.002) | 0.0013 (-0.31, 0.31; 0.99) | -0.28 (-0.56, -0.0069; 0.045) | 0.026 (-0.039, 0.090; 0.44)   | 0.098 (-0.035, 0.23; 0.15) |
| <b>Model B<sup>a</sup></b> |                             |                            |                               |                               |                            |
| Concurrent Cd              | -0.33 (-0.82, 0.16; 0.18)   | -0.70 (-1.2, -0.18; 0.008) | -0.55 (-1.0, -0.078; 0.022)   | -0.059 (-0.17, 0.049; 0.28)   | 0.11 (-0.12, 0.33; 0.36)   |
| Concurrent As              | -0.47 (-0.81, -0.14; 0.005) | 0.12 (-0.23, 0.48; 0.49)   | -0.25 (-0.57, 0.063; 0.12)    | 0.039 (-0.035, 0.11; 0.30)    | 0.042 (-0.11, 0.19; 0.59)  |
| <b>Model C<sup>a</sup></b> |                             |                            |                               |                               |                            |
| Maternal Cd                | -1.2 (-1.8, -0.58; <0.001)  | -0.63 (-1.3, 0.015; 0.055) | -0.98 (-1.6, -0.37; 0.001)    | 0.033 (-0.11, 0.17; 0.65)     | 0.071 (-0.22, 0.36; 0.63)  |
| Maternal Pb                | 0.53 (-0.23, 1.3; 0.17)     | -0.19 (-0.96, 0.57; 0.62)  | 0.10 (-0.60, 0.81; 0.77)      | 0.052 (-0.11, 0.21; 0.54)     | 0.29 (-0.053, 0.63; 0.098) |

**Supplemental Material, Table S1 (continued)**

|                            | <b>VIQ</b>                  | <b>PIQ</b>                  | <b>FSIQ</b>                  | <b>SDQ<sub>pro</sub></b>    | <b>SDQ<sub>diff</sub></b>   |
|----------------------------|-----------------------------|-----------------------------|------------------------------|-----------------------------|-----------------------------|
| Predictors                 | $\beta$ (95% CI; <i>p</i> ) | $\beta$ (95% CI; <i>p</i> ) | $\beta$ (95% CI; <i>p</i> )  | $\beta$ (95% CI; <i>p</i> ) | $\beta$ (95% CI; <i>p</i> ) |
| <b>Model D<sup>a</sup></b> |                             |                             |                              |                             |                             |
| Concurrent Cd              | -0.51 (-1.0, -0.015; 0.044) | -0.73 (-1.2, -0.21; 0.006)  | -0.68 (-1.1, -0.22; 0.004)   | -0.057 (-0.17, 0.051; 0.30) | 0.12 (-0.10, 0.35; 0.29)    |
| Concurrent Pb              | 0.38 (-0.16, 0.92; 0.17)    | 0.24 (-0.33, 0.81; 0.41)    | 0.41 (-0.11, 0.93; 0.12)     | -0.020 (-0.14, 0.10; 0.74)  | -0.050 (-0.29, 0.20; 0.70)  |
| <b>Model E<sup>a</sup></b> |                             |                             |                              |                             |                             |
| Maternal Cd                | -1.1 (-1.7, -0.46; 0.001)   | -0.61 (-1.3, 0.010; 0.066)  | -0.89 (-1.5, -0.29; 0.004)   | 0.026 (-0.11, 0.17; 0.71)   | 0.064 (-0.23, 0.35; 0.67)   |
| Maternal As                | -0.55 (-0.93, -0.18; 0.004) | -0.10 (-0.49, 0.28; 0.60)   | -0.40 (-0.76, -0.051; 0.025) | 0.031 (-0.053, 0.11; 0.47)  | 0.037 (-0.13, 0.21; 0.67)   |
| Maternal Pb                | 0.45 (-0.29, 1.2; 0.23)     | -0.21 (-0.98, 0.56; 0.60)   | 0.052 (-0.65, 0.76; 0.88)    | 0.055 (-0.11, 0.22; 0.51)   | 0.29 (-0.050, 0.63; 0.094)  |
| <b>Model F<sup>a</sup></b> |                             |                             |                              |                             |                             |
| Concurrent Cd              | -0.40 (-0.90, 0.098; 0.12)  | -0.74 (-1.3, -0.21; 0.006)  | -0.61 (-1.1, -0.14; 0.011)   | -0.057 (-0.17, 0.053; 0.31) | 0.11 (-0.12, 0.34; 0.34)    |
| Concurrent As              | -0.47 (-0.81, -0.14; 0.005) | 0.12 (-0.23, 0.48; 0.50)    | -0.26 (-0.57, 0.062; 0.12)   | 0.039 (-0.035, 0.11; 0.30)  | 0.042 (-0.11, 0.19; 0.59)   |
| Concurrent Pb              | 0.41 (-0.13, 0.96; 0.14)    | 0.24 (-0.34, 0.82; 0.41)    | 0.44 (-0.084, 0.95; 0.10)    | -0.016 (-0.14, 0.11; 0.80)  | -0.039 (-0.29, 0.21; 0.76)  |

<sup>a</sup>Besides the variables presented below each model we further adjusted all models for age at testing, tester, sex, birth order, birth weight, HAZ at 5 years, HOME, maternal BMI in early pregnancy, maternal IQ, and SES.
